# Supplementary material
Source: publisher figshare collection journal article supplement (https://acs.figshare.com/ndownloader/files/4711612)
Supplement: Supplementary file 1 [file 4711612]

  
data_60322c 
  
_audit_creation_method            SHELXL-97 
_chemical_name_systematic 
; 
 ? 
; 
_chemical_name_common             ? 
_chemical_melting_point           ? 
_chemical_formula_moiety          ? 
_chemical_formula_sum 
 'C10 H9 Ho N4 O10' 
_chemical_formula_weight          510.14 
  
loop_ 
 _atom_type_symbol 
 _atom_type_description 
 _atom_type_scat_dispersion_real 
 _atom_type_scat_dispersion_imag 
 _atom_type_scat_source 
 'C'  'C'   0.0033   0.0016 
 'International Tables Vol C Tables 4.2.6.8 and 6.1.1.4' 
 'H'  'H'   0.0000   0.0000 
 'International Tables Vol C Tables 4.2.6.8 and 6.1.1.4' 
 'N'  'N'   0.0061   0.0033 
 'International Tables Vol C Tables 4.2.6.8 and 6.1.1.4' 
 'O'  'O'   0.0106   0.0060 
 'International Tables Vol C Tables 4.2.6.8 and 6.1.1.4' 
 'Ho'  'Ho'  -0.2175   4.6783 
 'International Tables Vol C Tables 4.2.6.8 and 6.1.1.4' 
  
_symmetry_cell_setting            Monoclinic 
_symmetry_space_group_name_H-M    P2(1)/n 
  
loop_ 
 _symmetry_equiv_pos_as_xyz 
 'x, y, z' 
 '-x+1/2, y+1/2, -z+1/2' 
 '-x, -y, -z' 
 'x-1/2, -y-1/2, z-1/2' 
  
_cell_length_a                    10.861(6) 
_cell_length_b                    9.295(5) 
_cell_length_c                    14.259(7) 
_cell_angle_alpha                 90.00 
_cell_angle_beta                  104.901(7) 
_cell_angle_gamma                 90.00 
_cell_volume                      1391.0(12) 
_cell_formula_units_Z             4 
_cell_measurement_temperature     293(2) 
_cell_measurement_reflns_used     3457 
_cell_measurement_theta_min       2.73 
_cell_measurement_theta_max       27.73 
  
_exptl_crystal_description        BLOCK 
_exptl_crystal_colour             PALE-RED 
_exptl_crystal_size_max           0.24 
_exptl_crystal_size_mid           0.20 
_exptl_crystal_size_min           0.18 
_exptl_crystal_density_meas       NONE 
_exptl_crystal_density_diffrn     1.738 
_exptl_crystal_density_method     'not measured' 
_exptl_crystal_F_000              711 
_exptl_absorpt_coefficient_mu     4.280 
_exptl_absorpt_correction_type    MULTI-SCAN 
_exptl_absorpt_correction_T_min   0.716600 
_exptl_absorpt_correction_T_max   1.000000 
_exptl_absorpt_process_details    SADABS 
  
_exptl_special_details 
; 
 ? 
; 
  
_diffrn_ambient_temperature       293(2) 
_diffrn_radiation_wavelength      0.71073 
_diffrn_radiation_type            MoK\a 
_diffrn_radiation_source          'fine-focus sealed tube' 
_diffrn_radiation_monochromator   graphite 
_diffrn_measurement_device_type   'APEX II CCD area detector' 
_diffrn_measurement_method        'phi and omega scans' 
_diffrn_detector_area_resol_mean  ? 
_diffrn_standards_number          ? 
_diffrn_standards_interval_count  ? 
_diffrn_standards_interval_time   ? 
_diffrn_standards_decay_%         ? 
_diffrn_reflns_number             7243 
_diffrn_reflns_av_R_equivalents   0.0223 
_diffrn_reflns_av_sigmaI/netI     0.0241 
_diffrn_reflns_limit_h_min        -12 
_diffrn_reflns_limit_h_max        12 
_diffrn_reflns_limit_k_min        -11 
_diffrn_reflns_limit_k_max        10 
_diffrn_reflns_limit_l_min        -16 
_diffrn_reflns_limit_l_max        16 
_diffrn_reflns_theta_min          2.12 
_diffrn_reflns_theta_max          25.03 
_reflns_number_total              2434 
_reflns_number_gt                 2058 
_reflns_threshold_expression      >2sigma(I) 
  
_computing_data_collection        'Bruker SMART APEX II' 
_computing_cell_refinement        'Bruker SMART APEX II' 
_computing_data_reduction         'Bruker SAINT' 
_computing_structure_solution     'SHELXS-97 (Sheldrick, 1990)' 
_computing_structure_refinement   'SHELXL-97 (Sheldrick, 1997)' 
_computing_molecular_graphics     'Bruker SHELXTL' 
_computing_publication_material   'Bruker SHELXTL' 
  
_refine_special_details 
; 
 Refinement of F^2^ against ALL reflections.  The weighted R-factor wR and 
 goodness of fit S are based on F^2^, conventional R-factors R are based 
 on F, with F set to zero for negative F^2^. The threshold expression of 
 F^2^ > 2sigma(F^2^) is used only for calculating R-factors(gt) etc. and is 
 not relevant to the choice of reflections for refinement.  R-factors based 
 on F^2^ are statistically about twice as large as those based on F, and R- 
 factors based on ALL data will be even larger. 
; 
  
_refine_ls_structure_factor_coef  Fsqd 
_refine_ls_matrix_type            full 
_refine_ls_weighting_scheme       calc 
_refine_ls_weighting_details 
 'calc w=1/[\s^2^(Fo^2^)+(0.0163P)^2^+0.3516P] where P=(Fo^2^+2Fc^2^)/3' 
_atom_sites_solution_primary      direct 
_atom_sites_solution_secondary    difmap 
_atom_sites_solution_hydrogens    geom 
_refine_ls_hydrogen_treatment     constr 
_refine_ls_extinction_method      none 
_refine_ls_extinction_coef        ? 
_refine_ls_number_reflns          2434 
_refine_ls_number_parameters      227 
_refine_ls_number_restraints      0 
_refine_ls_R_factor_all           0.0210 
_refine_ls_R_factor_gt            0.0162 
_refine_ls_wR_factor_ref          0.0374 
_refine_ls_wR_factor_gt           0.0366 
_refine_ls_goodness_of_fit_ref    1.086 
_refine_ls_restrained_S_all       1.086 
_refine_ls_shift/su_max           0.001 
_refine_ls_shift/su_mean          0.000 
  
loop_ 
 _atom_site_label 
 _atom_site_type_symbol 
 _atom_site_fract_x 
 _atom_site_fract_y 
 _atom_site_fract_z 
 _atom_site_U_iso_or_equiv 
 _atom_site_adp_type 
 _atom_site_occupancy 
 _atom_site_symmetry_multiplicity 
 _atom_site_calc_flag 
 _atom_site_refinement_flags 
 _atom_site_disorder_assembly 
 _atom_site_disorder_group 
Ho1 Ho -0.044826(13) 0.628042(15) 0.234817(10) 0.01410(6) Uani 1 1 d . . . 
O1 O -0.2645(2) 0.9226(2) -0.00026(16) 0.0249(6) Uani 1 1 d . . . 
O2 O -0.1863(2) 0.7237(2) 0.08492(16) 0.0217(5) Uani 1 1 d . . . 
O3 O -0.2098(2) 0.4624(2) 0.20317(16) 0.0216(5) Uani 1 1 d . . . 
O4 O -0.2972(2) 0.2511(2) 0.21837(17) 0.0257(6) Uani 1 1 d . . . 
O5 O 0.1491(2) -0.0287(2) 0.47547(18) 0.0306(6) Uani 1 1 d . . . 
H5 H 0.2092 -0.0759 0.5073 0.046 Uiso 1 1 calc R . . 
O6 O 0.2957(2) 0.1471(3) 0.49188(19) 0.0343(6) Uani 1 1 d . . . 
O7 O 0.3214(2) 1.1182(2) 0.23188(16) 0.0210(5) Uani 1 1 d . . . 
O8 O 0.1964(2) 1.2986(2) 0.15756(16) 0.0228(5) Uani 1 1 d . . . 
N1 N 0.1084(3) 0.3320(3) 0.3865(2) 0.0226(7) Uani 1 1 d . . . 
H1 H 0.1792 0.3749 0.4124 0.027 Uiso 1 1 calc R . . 
N2 N 0.0073(2) 0.3958(3) 0.32680(19) 0.0208(6) Uani 1 1 d . . . 
N3 N 0.0156(2) 0.8603(3) 0.18446(19) 0.0202(6) Uani 1 1 d . . . 
N4 N 0.1184(2) 0.9437(3) 0.21484(19) 0.0197(6) Uani 1 1 d . . . 
H4 H 0.1845 0.9199 0.2598 0.024 Uiso 1 1 calc R . . 
C1 C -0.2056(3) 0.3366(3) 0.2365(2) 0.0171(7) Uani 1 1 d . . . 
C2 C -0.0823(3) 0.2919(3) 0.3027(2) 0.0163(7) Uani 1 1 d . . . 
C3 C -0.0364(3) 0.1620(3) 0.3481(2) 0.0184(7) Uani 1 1 d . . . 
H3 H -0.0793 0.0746 0.3434 0.022 Uiso 1 1 calc R . . 
C4 C 0.0853(3) 0.1914(3) 0.4010(2) 0.0185(7) Uani 1 1 d . . . 
C5 C 0.1884(3) 0.1013(3) 0.4614(2) 0.0205(7) Uani 1 1 d . . . 
C6 C -0.1822(3) 0.8564(3) 0.0623(2) 0.0174(7) Uani 1 1 d . . . 
C7 C -0.0661(3) 0.9362(3) 0.1154(2) 0.0164(7) Uani 1 1 d . . . 
C8 C -0.0138(3) 1.0693(3) 0.1032(2) 0.0162(7) Uani 1 1 d . . . 
H8 H -0.0516 1.1426 0.0612 0.019 Uiso 1 1 calc R . . 
C9 C 0.1057(3) 1.0696(3) 0.1664(2) 0.0159(7) Uani 1 1 d . . . 
C10 C 0.2158(3) 1.1711(3) 0.1867(2) 0.0181(7) Uani 1 1 d . . . 
O9 O 0.0016(2) 0.4897(2) 0.11237(15) 0.0252(6) Uani 1 1 d . . . 
H9A H 0.0658 0.4342 0.1215 0.038 Uiso 1 1 d R . . 
H9B H -0.0667 0.4593 0.0739 0.038 Uiso 1 1 d R . . 
O10 O 0.0256(2) 0.6959(3) 0.39727(17) 0.0314(6) Uani 1 1 d . . . 
H10A H 0.0939 0.6641 0.4350 0.047 Uiso 1 1 d R . . 
H10B H -0.0146 0.7607 0.4193 0.047 Uiso 1 1 d R . . 
  
loop_ 
 _atom_site_aniso_label 
 _atom_site_aniso_U_11 
 _atom_site_aniso_U_22 
 _atom_site_aniso_U_33 
 _atom_site_aniso_U_23 
 _atom_site_aniso_U_13 
 _atom_site_aniso_U_12 
Ho1 0.00995(9) 0.01099(8) 0.01817(9) 0.00066(6) -0.00220(6) -0.00013(6) 
O1 0.0183(13) 0.0224(13) 0.0257(13) 0.0050(10) -0.0094(11) -0.0012(10) 
O2 0.0168(13) 0.0172(12) 0.0246(13) 0.0028(10) -0.0065(10) -0.0045(9) 
O3 0.0147(13) 0.0137(12) 0.0319(13) 0.0044(10) -0.0021(10) 0.0011(9) 
O4 0.0149(13) 0.0244(13) 0.0334(14) 0.0052(11) -0.0017(11) -0.0082(10) 
O5 0.0259(15) 0.0197(13) 0.0375(15) 0.0083(11) -0.0078(12) 0.0024(11) 
O6 0.0174(15) 0.0337(15) 0.0428(16) 0.0127(12) -0.0083(12) -0.0006(11) 
O7 0.0095(12) 0.0202(12) 0.0292(13) 0.0018(10) -0.0027(10) 0.0003(10) 
O8 0.0163(13) 0.0133(12) 0.0329(14) -0.0003(10) -0.0041(11) -0.0013(9) 
N1 0.0116(15) 0.0197(15) 0.0290(16) 0.0060(12) -0.0080(13) -0.0028(11) 
N2 0.0134(15) 0.0170(15) 0.0260(15) 0.0053(12) -0.0056(12) -0.0012(11) 
N3 0.0124(14) 0.0190(15) 0.0238(15) 0.0043(12) -0.0054(12) -0.0031(12) 
N4 0.0116(15) 0.0165(14) 0.0244(15) 0.0051(12) -0.0075(12) -0.0031(11) 
C1 0.0143(19) 0.0185(18) 0.0183(17) -0.0007(13) 0.0038(15) -0.0005(13) 
C2 0.0141(18) 0.0173(17) 0.0166(17) -0.0005(13) 0.0025(14) -0.0024(13) 
C3 0.0166(19) 0.0119(17) 0.0251(18) 0.0019(13) 0.0025(15) 0.0008(13) 
C4 0.0186(19) 0.0168(16) 0.0169(17) 0.0022(14) -0.0013(15) 0.0024(14) 
C5 0.0185(19) 0.0193(18) 0.0219(18) 0.0008(14) 0.0020(15) 0.0016(14) 
C6 0.0143(17) 0.0193(18) 0.0166(16) -0.0005(14) 0.0005(14) -0.0021(13) 
C7 0.0131(17) 0.0179(16) 0.0163(17) 0.0010(13) 0.0004(14) 0.0018(13) 
C8 0.0112(17) 0.0149(16) 0.0193(17) 0.0028(13) -0.0021(14) 0.0010(13) 
C9 0.0138(17) 0.0147(16) 0.0172(16) 0.0002(13) 0.0003(14) -0.0012(13) 
C10 0.0169(19) 0.0189(18) 0.0172(17) -0.0016(13) 0.0020(15) -0.0007(14) 
O9 0.0135(12) 0.0312(14) 0.0254(13) -0.0078(10) -0.0047(10) 0.0050(10) 
O10 0.0224(15) 0.0412(15) 0.0235(13) -0.0085(11) -0.0070(11) 0.0135(12) 
  
_geom_special_details 
; 
 All esds (except the esd in the dihedral angle between two l.s. planes) 
 are estimated using the full covariance matrix.  The cell esds are taken 
 into account individually in the estimation of esds in distances, angles 
 and torsion angles; correlations between esds in cell parameters are only 
 used when they are defined by crystal symmetry.  An approximate (isotropic) 
 treatment of cell esds is used for estimating esds involving l.s. planes. 
; 
  
loop_ 
 _geom_bond_atom_site_label_1 
 _geom_bond_atom_site_label_2 
 _geom_bond_distance 
 _geom_bond_site_symmetry_2 
 _geom_bond_publ_flag 
Ho1 O4 2.299(2) 2_455 ? 
Ho1 O3 2.317(2) . ? 
Ho1 O9 2.325(2) . ? 
Ho1 O10 2.332(2) . ? 
Ho1 O7 2.351(2) 2_545 ? 
Ho1 N3 2.418(3) . ? 
Ho1 O2 2.456(2) . ? 
Ho1 N2 2.514(3) . ? 
O1 C6 1.250(4) . ? 
O2 C6 1.279(4) . ? 
O3 C1 1.259(4) . ? 
O4 C1 1.247(4) . ? 
O4 Ho1 2.299(2) 2_445 ? 
O5 C5 1.314(4) . ? 
O5 H5 0.8200 . ? 
O6 C5 1.212(4) . ? 
O7 C10 1.263(4) . ? 
O7 Ho1 2.351(2) 2 ? 
O8 C10 1.256(4) . ? 
N1 N2 1.343(4) . ? 
N1 C4 1.356(4) . ? 
N1 H1 0.8600 . ? 
N2 C2 1.351(4) . ? 
N3 N4 1.336(4) . ? 
N3 C7 1.344(4) . ? 
N4 C9 1.348(4) . ? 
N4 H4 0.8600 . ? 
C1 C2 1.485(4) . ? 
C2 C3 1.400(4) . ? 
C3 C4 1.371(4) . ? 
C3 H3 0.9300 . ? 
C4 C5 1.483(4) . ? 
C6 C7 1.490(4) . ? 
C7 C8 1.391(4) . ? 
C8 C9 1.377(4) . ? 
C8 H8 0.9300 . ? 
C9 C10 1.491(4) . ? 
O9 H9A 0.8500 . ? 
O9 H9B 0.8500 . ? 
O10 H10A 0.8500 . ? 
O10 H10B 0.8499 . ? 
  
loop_ 
 _geom_angle_atom_site_label_1 
 _geom_angle_atom_site_label_2 
 _geom_angle_atom_site_label_3 
 _geom_angle 
 _geom_angle_site_symmetry_1 
 _geom_angle_site_symmetry_3 
 _geom_angle_publ_flag 
O4 Ho1 O3 77.84(9) 2_455 . ? 
O4 Ho1 O9 144.58(8) 2_455 . ? 
O3 Ho1 O9 78.03(8) . . ? 
O4 Ho1 O10 69.86(9) 2_455 . ? 
O3 Ho1 O10 114.38(9) . . ? 
O9 Ho1 O10 144.72(8) . . ? 
O4 Ho1 O7 140.28(8) 2_455 2_545 ? 
O3 Ho1 O7 136.02(8) . 2_545 ? 
O9 Ho1 O7 73.65(8) . 2_545 ? 
O10 Ho1 O7 75.65(8) . 2_545 ? 
O4 Ho1 N3 85.54(9) 2_455 . ? 
O3 Ho1 N3 142.24(8) . . ? 
O9 Ho1 N3 98.20(9) . . ? 
O10 Ho1 N3 90.51(9) . . ? 
O7 Ho1 N3 75.52(8) 2_545 . ? 
O4 Ho1 O2 74.10(9) 2_455 . ? 
O3 Ho1 O2 77.96(8) . . ? 
O9 Ho1 O2 75.79(8) . . ? 
O10 Ho1 O2 137.63(8) . . ? 
O7 Ho1 O2 124.91(8) 2_545 . ? 
N3 Ho1 O2 64.88(8) . . ? 
O4 Ho1 N2 111.12(9) 2_455 . ? 
O3 Ho1 N2 65.80(8) . . ? 
O9 Ho1 N2 81.59(9) . . ? 
O10 Ho1 N2 75.03(9) . . ? 
O7 Ho1 N2 77.23(8) 2_545 . ? 
N3 Ho1 N2 151.59(9) . . ? 
O2 Ho1 N2 140.48(8) . . ? 
C6 O2 Ho1 120.94(19) . . ? 
C1 O3 Ho1 126.3(2) . . ? 
C1 O4 Ho1 150.6(2) . 2_445 ? 
C5 O5 H5 109.5 . . ? 
C10 O7 Ho1 147.5(2) . 2 ? 
N2 N1 C4 111.6(3) . . ? 
N2 N1 H1 124.2 . . ? 
C4 N1 H1 124.2 . . ? 
N1 N2 C2 105.3(3) . . ? 
N1 N2 Ho1 138.4(2) . . ? 
C2 N2 Ho1 115.5(2) . . ? 
N4 N3 C7 105.8(3) . . ? 
N4 N3 Ho1 133.6(2) . . ? 
C7 N3 Ho1 120.5(2) . . ? 
N3 N4 C9 111.8(3) . . ? 
N3 N4 H4 124.1 . . ? 
C9 N4 H4 124.1 . . ? 
O4 C1 O3 124.3(3) . . ? 
O4 C1 C2 119.6(3) . . ? 
O3 C1 C2 116.1(3) . . ? 
N2 C2 C3 110.6(3) . . ? 
N2 C2 C1 115.7(3) . . ? 
C3 C2 C1 133.7(3) . . ? 
C4 C3 C2 105.1(3) . . ? 
C4 C3 H3 127.4 . . ? 
C2 C3 H3 127.4 . . ? 
N1 C4 C3 107.4(3) . . ? 
N1 C4 C5 119.4(3) . . ? 
C3 C4 C5 133.2(3) . . ? 
O6 C5 O5 126.0(3) . . ? 
O6 C5 C4 121.5(3) . . ? 
O5 C5 C4 112.4(3) . . ? 
O1 C6 O2 126.1(3) . . ? 
O1 C6 C7 118.3(3) . . ? 
O2 C6 C7 115.6(3) . . ? 
N3 C7 C8 110.2(3) . . ? 
N3 C7 C6 115.1(3) . . ? 
C8 C7 C6 134.3(3) . . ? 
C9 C8 C7 105.4(3) . . ? 
C9 C8 H8 127.3 . . ? 
C7 C8 H8 127.3 . . ? 
N4 C9 C8 106.8(3) . . ? 
N4 C9 C10 118.6(3) . . ? 
C8 C9 C10 134.6(3) . . ? 
O8 C10 O7 126.1(3) . . ? 
O8 C10 C9 118.4(3) . . ? 
O7 C10 C9 115.5(3) . . ? 
Ho1 O9 H9A 123.2 . . ? 
Ho1 O9 H9B 110.3 . . ? 
H9A O9 H9B 116.3 . . ? 
Ho1 O10 H10A 123.0 . . ? 
Ho1 O10 H10B 119.4 . . ? 
H10A O10 H10B 117.4 . . ? 
  
loop_ 
 _geom_torsion_atom_site_label_1 
 _geom_torsion_atom_site_label_2 
 _geom_torsion_atom_site_label_3 
 _geom_torsion_atom_site_label_4 
 _geom_torsion 
 _geom_torsion_site_symmetry_1 
 _geom_torsion_site_symmetry_2 
 _geom_torsion_site_symmetry_3 
 _geom_torsion_site_symmetry_4 
 _geom_torsion_publ_flag 
O4 Ho1 O2 C6 76.8(2) 2_455 . . . ? 
O3 Ho1 O2 C6 157.4(2) . . . . ? 
O9 Ho1 O2 C6 -122.1(2) . . . . ? 
O10 Ho1 O2 C6 44.3(3) . . . . ? 
O7 Ho1 O2 C6 -64.2(3) 2_545 . . . ? 
N3 Ho1 O2 C6 -15.8(2) . . . . ? 
N2 Ho1 O2 C6 -179.1(2) . . . . ? 
O4 Ho1 O3 C1 -123.5(3) 2_455 . . . ? 
O9 Ho1 O3 C1 82.7(3) . . . . ? 
O10 Ho1 O3 C1 -62.4(3) . . . . ? 
O7 Ho1 O3 C1 32.0(3) 2_545 . . . ? 
N3 Ho1 O3 C1 170.6(2) . . . . ? 
O2 Ho1 O3 C1 160.5(3) . . . . ? 
N2 Ho1 O3 C1 -3.4(2) . . . . ? 
C4 N1 N2 C2 -0.2(4) . . . . ? 
C4 N1 N2 Ho1 -168.8(2) . . . . ? 
O4 Ho1 N2 N1 -120.7(3) 2_455 . . . ? 
O3 Ho1 N2 N1 174.2(3) . . . . ? 
O9 Ho1 N2 N1 93.6(3) . . . . ? 
O10 Ho1 N2 N1 -59.7(3) . . . . ? 
O7 Ho1 N2 N1 18.6(3) 2_545 . . . ? 
N3 Ho1 N2 N1 1.9(4) . . . . ? 
O2 Ho1 N2 N1 148.9(3) . . . . ? 
O4 Ho1 N2 C2 71.4(2) 2_455 . . . ? 
O3 Ho1 N2 C2 6.3(2) . . . . ? 
O9 Ho1 N2 C2 -74.2(2) . . . . ? 
O10 Ho1 N2 C2 132.4(2) . . . . ? 
O7 Ho1 N2 C2 -149.3(2) 2_545 . . . ? 
N3 Ho1 N2 C2 -166.0(2) . . . . ? 
O2 Ho1 N2 C2 -18.9(3) . . . . ? 
O4 Ho1 N3 N4 114.0(3) 2_455 . . . ? 
O3 Ho1 N3 N4 177.6(2) . . . . ? 
O9 Ho1 N3 N4 -101.4(3) . . . . ? 
O10 Ho1 N3 N4 44.3(3) . . . . ? 
O7 Ho1 N3 N4 -30.7(3) 2_545 . . . ? 
O2 Ho1 N3 N4 -171.4(3) . . . . ? 
N2 Ho1 N3 N4 -13.9(4) . . . . ? 
O4 Ho1 N3 C7 -61.4(2) 2_455 . . . ? 
O3 Ho1 N3 C7 2.1(3) . . . . ? 
O9 Ho1 N3 C7 83.1(2) . . . . ? 
O10 Ho1 N3 C7 -131.2(2) . . . . ? 
O7 Ho1 N3 C7 153.8(3) 2_545 . . . ? 
O2 Ho1 N3 C7 13.1(2) . . . . ? 
N2 Ho1 N3 C7 170.6(2) . . . . ? 
C7 N3 N4 C9 -0.9(4) . . . . ? 
Ho1 N3 N4 C9 -176.9(2) . . . . ? 
Ho1 O4 C1 O3 -107.7(4) 2_445 . . . ? 
Ho1 O4 C1 C2 71.5(5) 2_445 . . . ? 
Ho1 O3 C1 O4 179.3(2) . . . . ? 
Ho1 O3 C1 C2 0.2(4) . . . . ? 
N1 N2 C2 C3 0.1(4) . . . . ? 
Ho1 N2 C2 C3 171.8(2) . . . . ? 
N1 N2 C2 C1 179.6(3) . . . . ? 
Ho1 N2 C2 C1 -8.7(3) . . . . ? 
O4 C1 C2 N2 -173.1(3) . . . . ? 
O3 C1 C2 N2 6.1(4) . . . . ? 
O4 C1 C2 C3 6.2(6) . . . . ? 
O3 C1 C2 C3 -174.6(3) . . . . ? 
N2 C2 C3 C4 0.0(4) . . . . ? 
C1 C2 C3 C4 -179.4(3) . . . . ? 
N2 N1 C4 C3 0.2(4) . . . . ? 
N2 N1 C4 C5 177.1(3) . . . . ? 
C2 C3 C4 N1 -0.1(4) . . . . ? 
C2 C3 C4 C5 -176.4(3) . . . . ? 
N1 C4 C5 O6 -5.8(5) . . . . ? 
C3 C4 C5 O6 170.2(4) . . . . ? 
N1 C4 C5 O5 174.7(3) . . . . ? 
C3 C4 C5 O5 -9.2(5) . . . . ? 
Ho1 O2 C6 O1 -164.8(2) . . . . ? 
Ho1 O2 C6 C7 16.4(4) . . . . ? 
N4 N3 C7 C8 -0.5(4) . . . . ? 
Ho1 N3 C7 C8 176.1(2) . . . . ? 
N4 N3 C7 C6 172.9(3) . . . . ? 
Ho1 N3 C7 C6 -10.5(4) . . . . ? 
O1 C6 C7 N3 177.3(3) . . . . ? 
O2 C6 C7 N3 -3.9(4) . . . . ? 
O1 C6 C7 C8 -11.5(6) . . . . ? 
O2 C6 C7 C8 167.4(3) . . . . ? 
N3 C7 C8 C9 1.6(4) . . . . ? 
C6 C7 C8 C9 -170.0(3) . . . . ? 
N3 N4 C9 C8 2.0(4) . . . . ? 
N3 N4 C9 C10 -175.8(3) . . . . ? 
C7 C8 C9 N4 -2.1(3) . . . . ? 
C7 C8 C9 C10 175.1(3) . . . . ? 
Ho1 O7 C10 O8 -25.8(6) 2 . . . ? 
Ho1 O7 C10 C9 153.7(3) 2 . . . ? 
N4 C9 C10 O8 -165.5(3) . . . . ? 
C8 C9 C10 O8 17.5(5) . . . . ? 
N4 C9 C10 O7 15.0(4) . . . . ? 
C8 C9 C10 O7 -162.0(3) . . . . ? 
  
_diffrn_measured_fraction_theta_max    0.996 
_diffrn_reflns_theta_full              25.03 
_diffrn_measured_fraction_theta_full   0.996 
_refine_diff_density_max    0.468 
_refine_diff_density_min   -0.541 
_refine_diff_density_rms    0.085 
  
